# Supplementary material
Source: Elsevier journal article supplement (https://comptes-rendus.academie-sciences.fr/geoscience/article/10.1016/j.crte.2009.12.008/file/attach/mmc1.pdf)
Supplement: mmc1 [file mmc1.pdf]

**Table 1: Isotopic data used in this study.**

| Country | Location     | Formation name | Sample name | $^{87}\text{Sr}/^{86}\text{Sr}$ | $\delta^{13}\text{C}$<br>‰ PDB | Data source |
|---------|--------------|----------------|-------------|---------------------------------|--------------------------------|-------------|
| Oman    | Huqf         | Ara            | -           | 0,70918                         | 2,0                            | [14, 15]    |
| Oman    | Huqf         | Buah           | WBA76/1     | 0,70899                         | 0,6                            | [59]        |
| Oman    | Huqf         | Buah           | WBA103      | 0,70884                         | 2,2                            | [59]        |
| Oman    | Huqf         | Buah           | -           | 0,70921                         | -1,9                           | [14, 15]    |
| Oman    | Huqf         | Buah           | -           | 0,70879                         | -0,2                           | [14, 15]    |
| Oman    | Huqf         | Buah           | -           | 0,70889                         | 0,0                            | [14, 15]    |
| Oman    | Huqf         | Buah           | -           | 0,70876                         | -1,0                           | [14, 15]    |
| Oman    | Huqf         | Buah           | -           | 0,70905                         | -1,3                           | [14, 15]    |
| Oman    | Huqf         | Buah           | -           | 0,70880                         | -1,1                           | [14, 15]    |
| Oman    | Huqf         | Buah           | -           | 0,70856                         | -5,0                           | [14, 15]    |
| Oman    | Huqf         | Buah           | -           | 0,70867                         | -4,5                           | [14, 15]    |
| Oman    | Huqf         | Shuram         | -           | 0,70859                         | -4,0                           | [14, 15]    |
| Oman    | Huqf         | Shuram         | -           | 0,70873                         | -6,1                           | [14, 15]    |
| Oman    | Huqf         | Shuram         | -           | 0,70876                         | -7,2                           | [14, 15]    |
| Oman    | Huqf         | Shuram         | -           | 0,70852                         | -8,3                           | [14, 15]    |
| Oman    | Jabal Akhdar | Khufai         | 1216        | 0,70800                         | 1,7                            | [59]        |
| Oman    | Jabal Akhdar | Khufai         | 1211        | 0,70789                         | 3,2                            | [59]        |
| Oman    | Jabal Akhdar | Khufai         | 1206        | 0,70791                         | 5,7                            | [59]        |
| Oman    | Huqf         | Khufai         | -           | 0,70855                         | 3,0                            | [14, 15]    |
| Oman    | Huqf         | Khufai         | -           | 0,70844                         | 2,3                            | [14, 15]    |
| Oman    | Huqf         | Khufai         | -           | 0,70852                         | 3,6                            | [14, 15]    |
| Oman    | Huqf         | Khufai         | -           | 0,70840                         | 3,2                            | [14, 15]    |
| Oman    | Huqf         | Khufai         | -           | 0,70822                         | 3,9                            | [14, 15]    |
| Oman    | Huqf         | Khufai         | -           | 0,70801                         | 4,2                            | [14, 15]    |
| Oman    | Huqf         | Khufai         | -           | 0,70847                         | 4,8                            | [14, 15]    |
| Oman    | Huqf         | Khufai         | -           | 0,70843                         | 3,5                            | [14, 15]    |
| Oman    | Huqf         | Khufai         | -           | 0,70799                         | 3,3                            | [14, 15]    |
| Oman    | Huqf         | Khufai         | -           | 0,70844                         | 3,7                            | [14, 15]    |
| Oman    | Jabal Akhdar | Abu Mahara     | -           | 0,70822                         | -1,7                           | [14, 15]    |
| Oman    | Jabal Akhdar | Abu Mahara     | -           | 0,70855                         | -0,7                           | [14, 15]    |
| Oman    | Jabal Akhdar | Abu Mahara     | -           | 0,70851                         | -0,9                           | [14, 15]    |
| Oman    | Jabal Akhdar | Abu Mahara     | -           | 0,70838                         | -0,5                           | [14, 15]    |
| Oman    | Jabal Akhdar | Abu Mahara     | -           | 0,70833                         | -0,6                           | [14, 15]    |
| Oman    | Jabal Akhdar | Abu Mahara     | -           | 0,70856                         | -1,0                           | [14, 15]    |
| China   |              | Dengying       | -           | 0,70999                         | 2,4                            | [93]        |
| China   |              | Dengying       | -           | 0,70937                         | 2,7                            | [93]        |
| China   |              | Dengying       | -           | 0,70999                         | 2,5                            | [93]        |
| China   |              | Dengying       | -           | 0,70989                         | 3,2                            | [93]        |
| China   |              | Dengying       | -           | 0,70847                         | 2,6                            | [93]        |
| China   |              | Dengying       | -           | 0,70841                         | 2,9                            | [93]        |
| China   |              | Dengying       | -           | 0,70872                         | 3,0                            | [93]        |
| China   |              | Dengying       | -           | 0,70916                         | 1,5                            | [93]        |
| China   |              | Doushantuo     | -           | 0,70847                         | -3,1                           | [93]        |
| China   |              | Doushantuo     | -           | 0,70871                         | -1,2                           | [93]        |
| China   |              | Doushantuo     | -           | 0,70950                         | -0,1                           | [93]        |
| China   |              | Doushantuo     | -           | 0,70803                         | 0,4                            | [93]        |
| China   |              | Doushantuo     | -           | 0,70781                         | 5,3                            | [93]        |
| China   |              | Doushantuo     | -           | 0,70789                         | 4,1                            | [93]        |
| China   |              | Doushantuo     | -           | 0,70817                         | 4,1                            | [93]        |

|         |              |             |          |          |       |         |
|---------|--------------|-------------|----------|----------|-------|---------|
| China   |              | Doushantuo  | -        | 0,70775  | 6,4   | [93]    |
| China   |              | Doushantuo  | -        | 0,70869  | 1,6   | [93]    |
| India   |              | Tal         | T4       | 0,70920  | -2,5  | [83]    |
| India   |              | Tal         | T3       | 0,70980  | -2,9  | [83]    |
| India   |              | KrolE       | KE2      | 0,71510  | 0,0   | [83]    |
| India   |              | KrolE       | KE1      | 0,71510  | 0,5   | [83]    |
| India   |              | KrolD       | KD3      | 0,70940  | 2,4   | [83]    |
| India   |              | KrolD       | KD2      | 0,70910  | 4,6   | [83]    |
| India   |              | KrolD       | KD1      | 0,70910  | 4,8   | [83]    |
| India   |              | KrolC       | KC6,1    | 0,71100  | 2,4   | [83]    |
| India   |              | KrolC       | KC6      | 0,70940  | 6,5   | [83]    |
| India   |              | KrolC       | KC5,1    | 0,71040  | 2,4   | [83]    |
| India   |              | KrolC       | KC       | 0,70880  | 2,1   | [83]    |
| India   |              | KrolC       | KC2      | 0,71220  | 2,1   | [83]    |
| Siberia | B. Zhigalovo | Middle Moty | cambrian | 0,70863* | -4,0  | [89,90] |
| Siberia | B. Zhigalovo | Middle Moty | cambrian | 0,70868* | -3,5  | [89,90] |
| Siberia | Chara River  | Lower Sen   | -        | 0,70730  | -3,5  | [72]    |
| Siberia | Chara River  | Sen         | -        | 0,70990  | -     | [72]    |
| Siberia | Chara River  | Kumukulakh  | -        | 0,70725  | -2,9  | [72]    |
| Siberia | Chara River  | Kumukulakh  | -        | 0,70734  | -2,9  | [72]    |
| Siberia | Ura Uplift   | Barakun     | -        | 0,70776  | 8,1   | [72]    |
| Siberia | Ura Uplift   | Barakun     | -        | 0,70790  | 7,2   | [72]    |
| Siberia | Ura Uplift   | Barakun     | -        | 0,70727  | 7,1   | [72]    |
| Siberia | Ura Uplift   | Barakun     | -        | 0,70952  | 6,0   | [72]    |
| Siberia | Berezovsk    | Moldoun     | -        | 0,70872  | 5,9   | [72]    |
| Siberia | Ura Uplift   | Barakun     | -        | 0,71051  | 4,6   | [72]    |
| Siberia | Ura Uplift   | Barakun     | -        | 0,70890  | 5,6   | [72]    |
| Siberia | Ura Uplift   | Valyukhta   | -        | 0,70781  | 5,9   | [72]    |
| Siberia | Ura Uplift   | Valyukhta   | -        | 0,70791  | 5,9   | [72]    |
| Siberia | Ura Uplift   | Valyukhta   | -        | 0,70769  | 5,1   | [72]    |
| Siberia | Berezovsk    | Kalancha    | -        | 0,71031  | 2,9   | [72]    |
| Siberia | Berezovsk    | Kalancha    | -        | 0,71055  | 3,2   | [72]    |
| Siberia | Berezovsk    | Khalatyrbyt | -        | 0,71198  | 3,7   | [72]    |
| Siberia | Berezovsk    | Khalatyrbyt | -        | 0,71067  | 3,6   | [72]    |
| Siberia | Ura Uplift   | Valyukhta   | -        | 0,70802  | 3,6   | [72]    |
| Siberia | Ura Uplift   | Valyukhta   | -        | 0,70920  | 5,1   | [72]    |
| Siberia | Ura Uplift   | Nikol'skoe  | -        | 0,70832  | -10,8 | [72]    |
| Siberia | Ura Uplift   | Nikol'skoe  | -        | 0,70932  | -10,2 | [72]    |
| Siberia | Ura Uplift   | Nikol'skoe  | -        | 0,70942  | -10,8 | [72]    |
| Siberia | Ura Uplift   | Nikol'skoe  | -        | 0,70829  | -12,5 | [72]    |
| Siberia | Ura Uplift   | Nikol'skoe  | -        | 0,70790  | -13,3 | [72]    |
| Siberia | Ura Uplift   | Nikol'skoe  | -        | 0,70801  | -13,5 | [72]    |
| Siberia | Berezovsk    | Chencha     | -        | 0,70823  | -9,9  | [72]    |
| Siberia | Berezovsk    | Chencha     | -        | 0,70836  | -9,4  | [72]    |
| Siberia | Chara River  | Torgo       | -        | 0,70917  | -9,6  | [72]    |
| Siberia | Chara River  | Torgo       | -        | 0,70822  | -10,4 | [72]    |
| Siberia | Chara River  | Torgo       | -        | 0,70810  | -8,8  | [72]    |
| Siberia | Chara River  | Torgo       | -        | 0,70832  | -9,0* | [72]    |
| Siberia | Ura Uplift   | Chencha     | -        | 0,70813  | -9,6  | [72]    |
| Siberia | Ura Uplift   | Chencha     | -        | 0,70874  | -9,1  | [72]    |
| Siberia | Ura Uplift   | Chencha     | -        | 0,70812  | -9,3  | [72]    |
| Siberia | Chara River  | Torgo       | -        | 0,70832  | -8,9  | [72]    |
| Siberia | Chara River  | Torgo       | -        | 0,70799  | -8,8  | [72]    |

|           |                |            |         |         |        |      |
|-----------|----------------|------------|---------|---------|--------|------|
| Siberia   | Ura Uplift     | Chencha    | -       | 0,70855 | -8,3   | [72] |
| Siberia   | Ura Uplift     | Chencha    | -       | 0,70826 | -7,6   | [72] |
| Siberia   | Borehole 2730  | Chencha    | -       | 0,70836 | -7,7*  | [72] |
| Siberia   | Ura Uplift     | Chencha    | -       | 0,70812 | -7,8   | [72] |
| Siberia   | Ura Uplift     | Chencha    | -       | 0,70803 | -7,7   | [72] |
| Siberia   | Ura Uplift     | Chencha    | -       | 0,70798 | -8,2   | [72] |
| Siberia   | Ura Uplift     | Chencha    | -       | 0,70786 | -7,7   | [72] |
| Siberia   | Chara River    | Tinnaya    | -       | 0,70837 | -0,1   | [72] |
| Siberia   | Ura Uplift     | Tn         | -       | 0,70855 | -0,5   | [72] |
| Siberia   | Borehole 1G    | Torgo 3    | -       | 0,71034 | -10,0* | [72] |
| Siberia   | Borehole 1G    | Torgo 3    | -       | 0,70836 | -10,0* | [72] |
| Siberia   | Borehole 1G    | Torgo 3    | -       | 0,71055 | -10,0* | [72] |
| Siberia   | Borehole 1G    | Torgo 2    | -       | 0,70860 | -10,0* | [72] |
| Siberia   | Borehole 1G    | Alekseev   | -       | 0,70975 | 4,0*   | [72] |
| Siberia   | Borehole 1G    | Alekseev   | -       | 0,71432 | 4,0*   | [72] |
| Siberia   | Borehole 1G    | Alekseev   | -       | 0,71103 | 4,0*   | [72] |
| Australia | Buyneroo G.    | Wonoka     | -       | 0,70901 | 2,4    | [16] |
| Australia | Officer Bassin | Narana     | -       | 0,70886 | -      | [17] |
| Australia | Brachina G.    | Wonoka     | -       | 0,70874 | -      | [17] |
| Australia | First Hill     | Wonoka     | -       | 0,70883 | -5,4   | [16] |
| Australia | Brachina G.    | Wonoka     | -       | 0,70888 | 2,3    | [16] |
| Australia | Brachina G.    | Wonoka     | -       | 0,70874 | 2,7    | [16] |
| Australia | First Hill     | Wonoka     | -       | 0,70876 | -6,5   | [16] |
| Australia | First Hill     | Wonoka     | -       | 0,70876 | -      | [17] |
| Australia | Buyneroo G.    | Wonoka     | -       | 0,70876 | -      | [17] |
| Australia |                | Wonoka     | -       | 0,70861 | -7,3   | [30] |
| Australia |                | Wonoka     | -       | 0,70900 | -7,5   | [30] |
| Australia |                | Wonoka     | -       | 0,70902 | -7,4   | [30] |
| Australia |                | Wonoka     | -       | 0,70901 | -      | [30] |
| Australia | Buyneroo G.    | Wonoka     | -       | 0,70899 | -6,3   | [16] |
| Australia | Buyneroo G.    | Wonoka     | -       | 0,70876 | -6,4   | [16] |
| Australia | Buyneroo G.    | Wonoka     | -       | 0,70868 | -7,7   | [16] |
| Australia | Buyneroo G.    | Wonoka     | -       | 0,70888 | -7,5   | [16] |
| Australia | Buyneroo G.    | Wonoka     | -       | 0,70910 | -7,5   | [16] |
| Australia |                | Wonoka     | -       | 0,71673 | 3,7    | [30] |
| Australia | Amadeus bassin | Julie      | -       | 0,70843 | -      | [17] |
| Australia | Amadeus bassin | Julie      | -       | 0,70836 | -      | [17] |
| Australia | Officer Bassin | Karlaya    | -       | 0,70791 | -      | [17] |
| Australia |                | Bunyeroo   | -       | 0,78002 | -      | [30] |
| Australia |                | Buyneroo   | -       | 0,77825 | -      | [30] |
| Australia |                | Buyneroo   | -       | 0,77165 | -      | [30] |
| Australia |                | Buyneroo   | -       | 0,74299 | -      | [30] |
| Australia |                | Buyneroo   | -       | 0,74241 | -      | [30] |
| Australia |                | Buyneroo   | -       | 0,73966 | -      | [30] |
| Australia |                | Buyneroo   | -       | 0,73947 | -      | [30] |
| Australia |                | Buyneroo   | -       | 0,73385 | -      | [30] |
| Australia |                | Brachina   | -       | 0,76928 | -      | [30] |
| Australia |                | Brachina   | -       | 0,74394 | -      | [30] |
| Australia |                | Nuccaleena | -       | 0,71308 | -3,0   | [16] |
| Australia |                | Nuccaleena | -       | 0,70948 | -      | [30] |
| Australia |                | Nuccaleena | -       | 0,70966 | -      | [30] |
| Australia |                | Nuccaleena | -       | 0,70947 | -2,4   | [30] |
| Canada    |                | Blueflower | N91-23K | 0,70862 | 2,1    | [65] |

|         |             |             |         |      |      |
|---------|-------------|-------------|---------|------|------|
| Canada  | Blueflower  | N91-23H     | 0,70861 | 1,0  | [65] |
| Canada  | Blueflower  | N91-23F     | 0,70842 | 0,5  | [65] |
| Canada  | Blueflower  | N91-23A     | 0,70855 | 2,2  | [65] |
| Canada  | Sheepbed    | N91-21-25   | 0,70889 | 5,9  | [65] |
| Canada  | Tepee       | N89-128A    | 0,70723 | -4,6 | [65] |
| Canada  | Redstone    | N98-1,00    | 0,71314 | -1,9 | [39] |
| Canada  | Redstone    | N98-1,01    | 0,71586 | -2,6 | [39] |
| Canada  | Redstone    | N98-1,02    | 0,71288 | -3,0 | [39] |
| Canada  | Redstone    | N98-1,08    | 0,71863 | -2,9 | [39] |
| Canada  | Redstone    | N98-1,10    | 0,71702 | -2,7 | [39] |
| Canada  | Redstone    | N98-1,18    | 0,71746 | -3,0 | [39] |
| Canada  | Redstone    | N98-1,21    | 0,71317 | -3,6 | [39] |
| Canada  | Redstone    | N98-1,26    | 0,71183 | -5,2 | [39] |
| Canada  | Redstone    | N98-1,31    | 0,71848 | -5,1 | [39] |
| Canada  | Redstone    | N98-1,36    | 0,71749 | -4,6 | [39] |
| Canada  | Redstone    | N98-1,40    | 0,71915 | -3,6 | [39] |
| Canada  | Shale L     | N98-10E     | 0,70818 | -4,2 | [39] |
| Canada  | Shale L     | N98-10N     | 0,70766 | -4,6 | [39] |
| Canada  | Shale L     | N98-10P     | 0,70712 | -4,6 | [39] |
| Canada  | Shale L     | N98-11,0    | 0,71095 | -3,4 | [39] |
| Canada  | Shale L     | N98-11,13   | 0,71315 | -3,4 | [39] |
| Canada  | Shale L     | N98-11,17   | 0,70971 | -4,9 | [39] |
| Canada  | Shale L     | N98-11,2    | 0,71065 | -3,1 | [39] |
| Canada  | Shale L     | N98-11,20   | 0,70862 | -4,9 | [39] |
| Canada  | Shale L     | N98-11,4    | 0,71822 | -2,7 | [39] |
| Canada  | Shale L     | N98-11,7    | 0,71797 | -2,8 | [39] |
| Canada  | Shale L     | N98-12C(M)  | 0,71365 | -1,2 | [39] |
| Canada  | Shale L     | N98-12C(R)  | 0,70867 | -1,3 | [39] |
| Canada  | Shale L     | N98-12G     | 0,70753 | -1,0 | [39] |
| Canada  | Ravensthoat | N98-20-10,3 | 0,70728 | -2,3 | [39] |
| Canada  | Ravensthoat | N98-20-10,5 | 0,70735 | -2,3 | [39] |
| Namibia | Maieberg    | F232        | 0,71059 | 1,5  | [48] |
| Namibia | Maieberg    | F220        | 0,70983 | 1,1  | [48] |
| Namibia | Maieberg    | F216        | 0,70782 | 3,0  | [48] |
| Namibia | Maieberg    | F213        | 0,70767 | 0,0  | [48] |
| Namibia | Maieberg    | F203        | 0,70766 | -0,2 | [48] |
| Namibia | Maieberg    | F200        | 0,70860 | 4,0  | [48] |
| Namibia | Maieberg    | F196        | 0,70883 | 3,0  | [48] |
| Namibia | Maieberg    | F194        | 0,71098 | 1,5  | [48] |
| Namibia | Maieberg    | F183        | 0,70916 | 1,4  | [48] |
| Namibia | Maieberg    | F169        | 0,70987 | 2,0  | [48] |
| Namibia | Maieberg    | F135        | 0,70858 | 0,7  | [48] |
| Namibia | Maieberg    | F133        | 0,70803 | 0,9  | [48] |
| Namibia | Maieberg    | F130        | 0,70807 | 2,0  | [48] |
| Namibia | Nama Group  | SN102       | 0,70870 | 1,7  | [45] |
| Namibia | Nama Group  | SN103       | 0,70892 | 0,8  | [45] |
| Namibia | Nama Group  | GG76        | 0,70942 | -1,2 | [45] |
| Namibia | Nama Group  | GG2B        | 0,70962 | 1,7  | [45] |
| Namibia | Nama Group  | GG3         | 0,70909 | 1,6  | [45] |
| Namibia | Nama Group  | SN75        | 0,70940 | 1,8  | [45] |
| Namibia | Nama Group  | SS17        | 0,70851 | 1,7  | [45] |
| Namibia | Nama Group  | SH12        | 0,70846 | 1,3  | [45] |
| Namibia | Nama Group  | NG91        | 0,70859 | 1,4  | [45] |

|          |          |               |              |         |       |      |
|----------|----------|---------------|--------------|---------|-------|------|
| Namibia  |          | Nama Group    | SH43         | 0,70853 | 1,2   | [45] |
| Namibia  |          | Nama Group    | NG90         | 0,70857 | 2,4   | [45] |
| Namibia  |          | Nama Group    | SH54         | 0,70858 | 1,5   | [45] |
| Namibia  |          | Nama Group    | NG87         | 0,70857 | 2,0   | [45] |
| Namibia  |          | Nama Group    | NG86         | 0,70885 | 2,2   | [45] |
| Namibia  |          | Nama Group    | SH49         | 0,70849 | 1,6   | [45] |
| Namibia  |          | Nama Group    | NG85         | 0,70858 | -0,8  | [45] |
| Namibia  |          | Nama Group    | NG84         | 0,70871 | -0,5  | [45] |
| Namibia  |          | Nama Group    | NG83         | 0,70852 | 0,1   | [45] |
| Namibia  |          | Nama Group    | NG81         | 0,70868 | 0,1   | [45] |
| Namibia  |          | Nama Group    | NG/N2        | 0,70849 | 0,2   | [45] |
| Namibia  |          | Nama Group    | KS145        | 0,70854 | 3,0   | [45] |
| Namibia  |          | Nama Group    | KM0115       | 0,70928 | 6,6   | [45] |
| Namibia  |          | Nama Group    | KM0116       | 0,70953 | 5,3   | [45] |
| Namibia  |          | Nama Group    | K0140        | 0,70884 | 2,8   | [45] |
| Namibia  |          | Nama Group    | K0137        | 0,70840 | 2,1   | [45] |
| Mongolia | 19       | Tsagaan Oloom | 96TST35      | 0,70716 | 3,9   | [11] |
| Mongolia | 19       | Tsagaan Oloom | 96TST37      | 0,70729 | 4,9   | [11] |
| Mongolia | 19       | Tsagaan Oloom | 96TST42      | 0,70713 | 8,3   | [11] |
| Mongolia |          | Tsagaan Oloom | T9           | 0,70729 | 6,9   | [11] |
| Mongolia | 19       | Tsagaan Oloom | 96TST55      | 0,70734 | 9,5   | [11] |
| Mongolia |          | Tsagaan Oloom | Tsag.19-TS7  | 0,70735 | 9,5*  | [11] |
| Mongolia |          | Tsagaan Oloom | Tsag.20-TS8  | 0,70725 | 9,5*  | [11] |
| Mongolia |          | Tsagaan Oloom | Tsag. 11     | 0,70827 | 9,5*  | [11] |
| Mongolia | 19       | Tsagaan Oloom | 96TST66      | 0,70729 | 7,4   | [11] |
| Mongolia |          | Tsagaan Oloom | Tsag.20-TS9  | 0,70725 | 5,5*  | [11] |
| Mongolia | 19       | Tsagaan Oloom | 96TST69      | 0,70735 | 9,2   | [11] |
| Mongolia |          | Tsagaan Oloom | Tsag.20-TS10 | 0,70769 | 6,0*  | [11] |
| Mongolia |          | Tsagaan Oloom | Tsag, 12     | 0,70786 | 6,0*  | [11] |
| Mongolia |          | Tsagaan Oloom | Tsag,13      | 0,70830 | 6,0*  | [11] |
| Mongolia |          | Tsagaan Oloom | Tsag,14      | 0,70836 | 6,0*  | [11] |
| Mongolia |          | Tsagaan Oloom | Tsag, 16     | 0,70789 | 6,0*  | [11] |
| Mongolia | 19       | Tsagaan Oloom | 96TST71      | 0,70725 | 2,4   | [11] |
| Mongolia |          | Tsagaan Oloom | KTN 1        | 0,70786 | 4,0*  | [11] |
| Mongolia |          | Tsagaan Oloom | KTN2         | 0,70810 | 4,0*  | [11] |
| Mongolia |          | Tsagaan Oloom | Tsag,21      | 0,70787 | 3,0*  | [11] |
| Mongolia |          | Tsagaan Oloom | KTN3         | 0,70805 | 3,0*  | [11] |
| Mongolia |          | Tsagaan Oloom | KTN4         | 0,70812 | 3,0*  | [11] |
| Mongolia |          | Tsagaan Oloom | Bay Sla      | 0,70864 | 2,0*  | [11] |
| Mongolia |          | Tsagaan Oloom | Bay SO       | 0,70853 | 2,0*  | [11] |
| Mongolia |          | Tsagaan Oloom | Tsag,20      | 0,70842 | 1,0*  | [11] |
| Mongolia |          | Tsagaan Oloom | BayS4        | 0,70853 | 1,0*  | [11] |
| Mongolia |          | Tsagaan Oloom | BayS5        | 0,70843 | 1,0*  | [11] |
| Mongolia | 20       | Tsagaan Oloom | 96TST75      | 0,70725 | 1,0   | [11] |
| Mongolia | 22       | Tsagaan Oloom | 96TST77      | 0,70769 | 1,0   | [11] |
| Mongolia | Cambrian | Tsagaan Oloom | Tsag,24      | 0,70855 | 0,0*  | [11] |
| Mongolia | Cambrian | Tsagaan Oloom | Bay, By 02   | 0,70843 | 0,0*  | [11] |
| Mongolia | Cambrian | Tsagaan Oloom | Bay, Bd14    | 0,70849 | 0,0*  | [11] |
| Mongolia | Cambrian | Tsagaan Oloom | Bay 2        | 0,70856 | -1,0* | [11] |
| Mongolia | Cambrian | Tsagaan Oloom | Bay 4        | 0,70844 | -1,0* | [11] |
| Mongolia | Cambrian | Tsagaan Oloom | Bay 33       | 0,70846 | -2,0* | [11] |
| Mongolia | Cambrian | Tsagaan Oloom | Tsag,25      | 0,70848 | -2,0* | [11] |
| Mongolia | Cambrian | Tsagaan Oloom | Bay 40       | 0,70857 | -2,0* | [11] |

|             |               |                    |                |         |       |      |
|-------------|---------------|--------------------|----------------|---------|-------|------|
| Mongolia    | Cambrian      | Tsagaan Oloom      | Bay 42         | 0,70865 | -4*   | [11] |
| Mongolia    | Cambrian      | Tsagaan Oloom      | Bay 44         | 0,70850 | -4*   | [11] |
| Mongolia    | Cambrian      | Tsagaan Oloom      | Tsag,26        | 0,70869 | -3,0* | [11] |
| Mongolia    | Cambrian      | Tsagaan Oloom      | Tsag,28        | 0,70843 | -3,0* | [11] |
| Mongolia    | Cambrian      | Tsagaan Oloom      | Tsag, 31       | 0,70854 | -2,0* | [11] |
| Mongolia    | Cambrian      | Tsagaan Oloom      | Tsag,32        | 0,70889 | -1,0* | [11] |
| Mongolia    | Cambrian      | Tsagaan Oloom      | Tsag,34        | 0,70873 | 0,0*  | [11] |
| Scandinavia | Nestbyfjellet | Leivset marble     | 1              | 0,70872 | -6,6  | [64] |
| Scandinavia | Nestbyfjellet | Leivset marble     | 2              | 0,70871 | -6,7  | [64] |
| Scandinavia | Nestbyfjellet | Leivset marble     | 6              | 0,70859 | -6,3  | [64] |
| Scandinavia | Nestbyfjellet | Leivset marble     | 9              | 0,70858 | -6,2  | [64] |
| Scandinavia | Nestbyfjellet | Leivset marble     | 13             | 0,70862 | -6,5  | [64] |
| Scandinavia | Nestbyfjellet | Leivset marble     | 14             | 0,70870 | -8,5  | [64] |
| Scandinavia | Nestbyfjellet | Leivset marble     | 15             | 0,70857 | -7,5  | [64] |
| Scandinavia | Nestbyfjellet | Leivset marble     | 16             | 0,70877 | -7,9  | [64] |
| Scandinavia | Nestbyfjellet | Leivset marble     | 17             | 0,70889 | -7,9  | [64] |
| Scandinavia | Nestbyfjellet | Leivset marble     | 18             | 0,70866 | -8,1  | [64] |
| Brazil      |               | Mirassol d'Oeste   | cap            | 0,70795 | -8,9  | [67] |
| Brazil      |               | Mirassol d'Oeste   | cap            | 0,70798 | -6,8  | [67] |
| Brazil      |               | Mirassol d'Oeste   | cap            | 0,70744 | -4,5  | [67] |
| Brazil      |               | Mirassol d'Oeste   | Mira-01        | 0,70852 | -4,3  | [26] |
| Brazil      |               | Mirassol d'Oeste   | cap            | 0,70765 | -4,9  | [67] |
| Brazil      |               | Mirassol d'Oeste   | cap            | 0,70781 | -4,2  | [67] |
| Brazil      |               | Mirassol d'Oeste   | cap            | 0,70774 | -5,1  | [67] |
| Brazil      |               | Mirassol d'Oeste   | Cac-16         | 0,70753 | -2,7  | [26] |
| Brazil      |               | Mirassol d'Oeste   | cap            | 0,70827 | -3,9  | [67] |
| Brazil      |               | Mirassol d'Oeste   | cap            | 0,70852 | -5,2  | [67] |
| Brazil      |               | Mirassol d'Oeste   | cap            | 0,70843 | -4,2  | [67] |
| Brazil      |               | Mirassol d'Oeste   | Mira-06        | 0,70848 | -7,0  | [26] |
| Brazil      |               | Mirassol d'Oeste   | cap            | 0,70904 | -4,6  | [67] |
| Brazil      |               | Mirassol d'Oeste   | cap            | 0,70953 | -3,6  | [67] |
| Brazil      |               | Mirassol d'Oeste   | cap            | 0,71129 | -4,9  | [67] |
| Brazil      |               | Mirassol d'Oeste   | cap            | 0,71120 | -8,1  | [67] |
| Brazil      |               | Mirassol d'Oeste   | Mira-09        | 0,70803 | -4,6  | [26] |
| Brazil      |               | Mirassol d'Oeste   | cap            | 0,70811 | -5,1  | [67] |
| Brazil      |               | Mirassol d'Oeste   | cap            | 0,70711 | -4,7  | [67] |
| Brazil      |               | Mirassol d'Oeste   | Cac-09         | 0,70754 | -1,6  | [26] |
| Brazil      |               | Mirassol d'Oeste   | cap            | 0,70766 | -5,1  | [67] |
| Brazil      |               | Mirassol d'Oeste   | cap            | 0,70795 | -5,0  | [67] |
| Brazil      |               | Mirassol d'Oeste   | cap            | 0,70764 | -4,9  | [67] |
| Brazil      |               | Mirassol d'Oeste   | TG-25          | 0,70740 | -4,9  | [27] |
| Brazil      |               | Mirassol d'Oeste   | BX-10-124/4-11 | 0,70763 | -1,9  | [27] |
| Brazil      |               | Mirassol d'Oeste   | cap            | 0,70783 | -4,7  | [67] |
| Brazil      |               | Mirassol d'Oeste   | Cac-06         | 0,70761 | -1,4  | [26] |
| Brazil      |               | Mirassol d'Oeste   | Araras-27      | 0,70982 | 2,2   | [26] |
| Brazil      |               | Guia               | NB-24          | 0,70767 | 0,1   | [27] |
| Brazil      |               | Guia               | NB-10          | 0,70776 | -0,9  | [27] |
| Brazil      |               | Guia               | NB-12          | 0,70780 | -0,7  | [27] |
| Brazil      |               | Serra do Quilomboc | -              | 0,70797 | -1,6  | [67] |
| Brazil      |               | Serra do Quilomboc | Araras-23      | 0,70854 | 2,7   | [26] |
| Brazil      |               | Serra do Quilomboc | -              | 0,70849 | -1,6  | [67] |
| Brazil      |               | Serra do Quilomboc | Araras-20      | 0,70734 | 1,9   | [26] |
| Brazil      |               | Serra do Quilomboc | -              | 0,70891 | -0,9  | [67] |

|        |                  |            |         |      |      |
|--------|------------------|------------|---------|------|------|
| Brazil | Serra do Quilomb | -          | 0,70823 | -0,4 | [67] |
| Brazil | Serra do Quilomb | -          | 0,70869 | 0,2  | [67] |
| Brazil | Nobres           | Araras-13  | 0,70875 | 2,7  | [26] |
| Brazil | Nobres           | -          | 0,70852 | 0,1  | [67] |
| Brazil | Nobres           | -          | 0,70850 | -0,8 | [67] |
| Brazil | Nobres           | -          | 0,70813 | -1,3 | [67] |
| Brazil | Nobres           | Araras-04  | 0,70870 | 1,8  | [26] |
| Brazil | Nobres           | -          | 0,70858 | -1,6 | [67] |
| Brazil | Nobres           | Araras-01B | 0,70960 | 9,6  | [26] |
| Brazil | Nobres           | -          | 0,70882 | -2,2 | [67] |
| Brazil | Nobres           | -          | 0,70818 | -1,0 | [67] |
| Brazil | Nobres           | Araras-31  | 0,70907 | -1,0 | [26] |
| Brazil | Nobres           | -          | 0,70880 | -0,6 | [67] |

\* recalculated from original illustration

Le Guerroue Table-1
